# Supplementary material for: A Facile Surface Modification Scheme for Medical-Grade Titanium and Polypropylene Using a Novel Mussel-Inspired Biomimetic Polymer with Cationic Quaternary Ammonium Functionalities for Antibacterial Application
Source: MDPI journal article supplement (doi:10.3390/polym16040503), 2024-02-12
Supplement: s1 [file s1]

# A facile surface modification scheme for medical-grade titanium and polypropylene using a novel mussel-inspired biomimetic polymer with cationic quaternary ammonium functionalities for antibacterial application

Chi-Hui Cheng<sup>1</sup>, Xiang-Zhen Zeng<sup>2</sup>, Wen-Yuan Chiu<sup>2</sup>, Jui-Che Lin<sup>2,3,4\*</sup>

<sup>1</sup>Department of Pediatrics, College of Medicine, Chang Gung University, Chang Gung Memorial Hospital, Taoyuan, Taiwan. E-mail: [pedneph.cheng@msa.hinet.net](mailto:pedneph.cheng@msa.hinet.net) (CHC)

<sup>2</sup>Department of Chemical Engineering, National Cheng Kung University, Tainan, Taiwan. E-mail: [q70w753753@gmail.com](mailto:q70w753753@gmail.com) (XZZ); [chiu1999.vivian@gmail.com](mailto:chiu1999.vivian@gmail.com) (WYC); [jclin@mail.ncku.edu.tw](mailto:jclin@mail.ncku.edu.tw) (JCL)

<sup>3</sup>Institute of Oral Medicine, <sup>4</sup>School of Dentistry, College of Medicine, National Cheng Kung University, Tainan, Taiwan. E-mail: [jclin@mail.ncku.edu.tw](mailto:jclin@mail.ncku.edu.tw) (JCL)

## Corresponding Author

\* Prof. Jui-Che Lin: Department of Chemical Engineering, National Cheng Kung University, Tainan, TAIWAN 70101, Phone: +886-6-275-7575 ext. 62665, Fax: +886-6-234-4996, Email: [jclin@mail.ncku.edu.tw](mailto:jclin@mail.ncku.edu.tw) ORCID ID: <https://orcid.org/0000-0003-4436-655X>

## S1. Synthesis of TFADA

The  $^1\text{H}$ -NMR spectra of TFADA were shown in Figure S1.  $^1\text{H}$ -NMR (500MHz, DMSO- $d_6$ )  $\delta$  (ppm) : 9.42 - 9.40 (t, 1H), 8.73 - 8.65 (d, 2H), 6.65 - 6.63 (d, 1H), 6.58 (d, 1H), 6.44 - 6.42 (d, 1H), 3.33 - 3.29 (q, 2H), 2.62 - 2.59 (t, 2H).

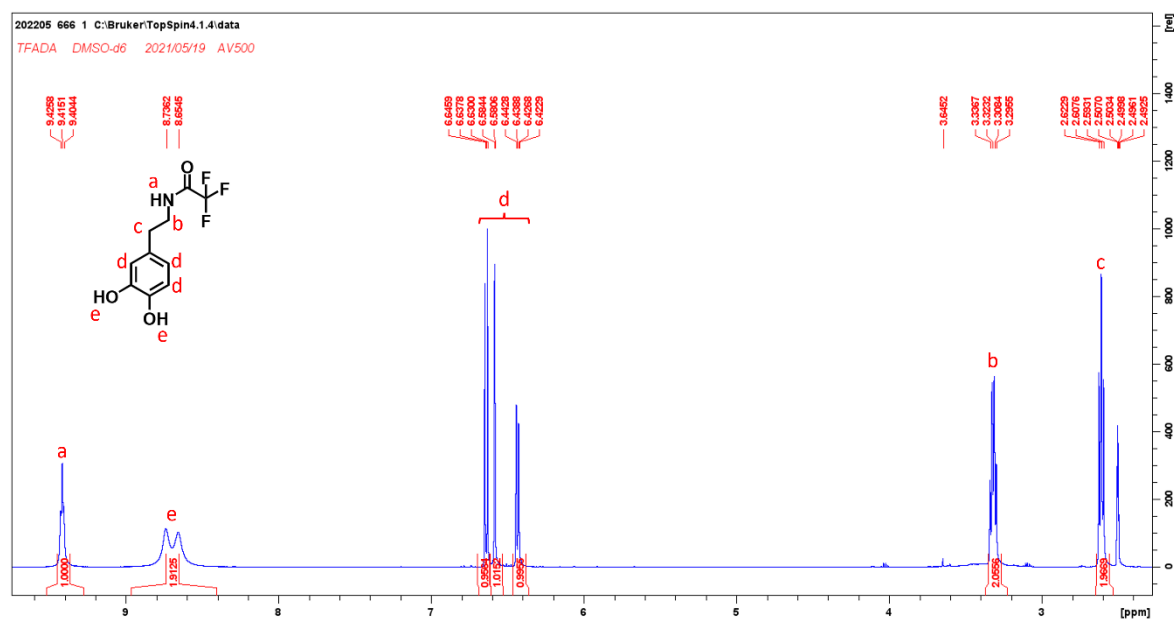

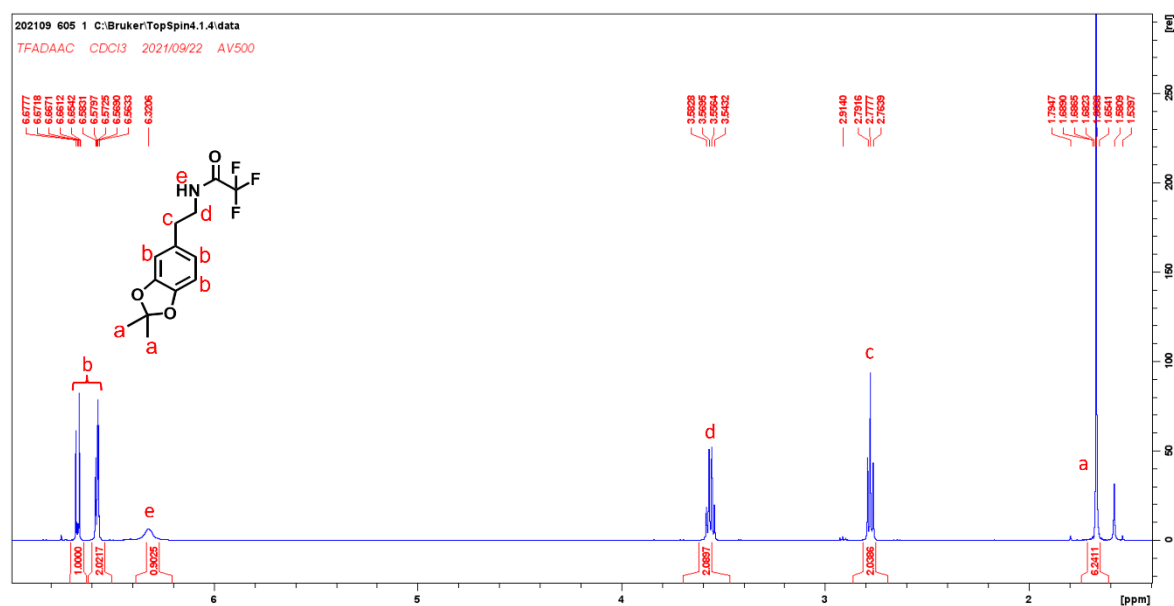

**Figure S2** The  $^1\text{H}$ -NMR spectra of TFADAAC

### S3. Synthesis of DAAC

The  $^1\text{H}$ -NMR spectra of DAAC was shown in Figure S3.  $^1\text{H}$ -NMR (500MHz,  $\text{CDCl}_3$ )  $\delta$  (ppm) : 6.60 – 6.54 (m, 1H), 6.54 – 6.52 (m, 2H), 3.10 – 2.99 (s, 2H), 2.98 – 2.85 (t, 2H), 2.65 – 2.61 (t, 2H), 1.61 – 1.59 (s, 6H).

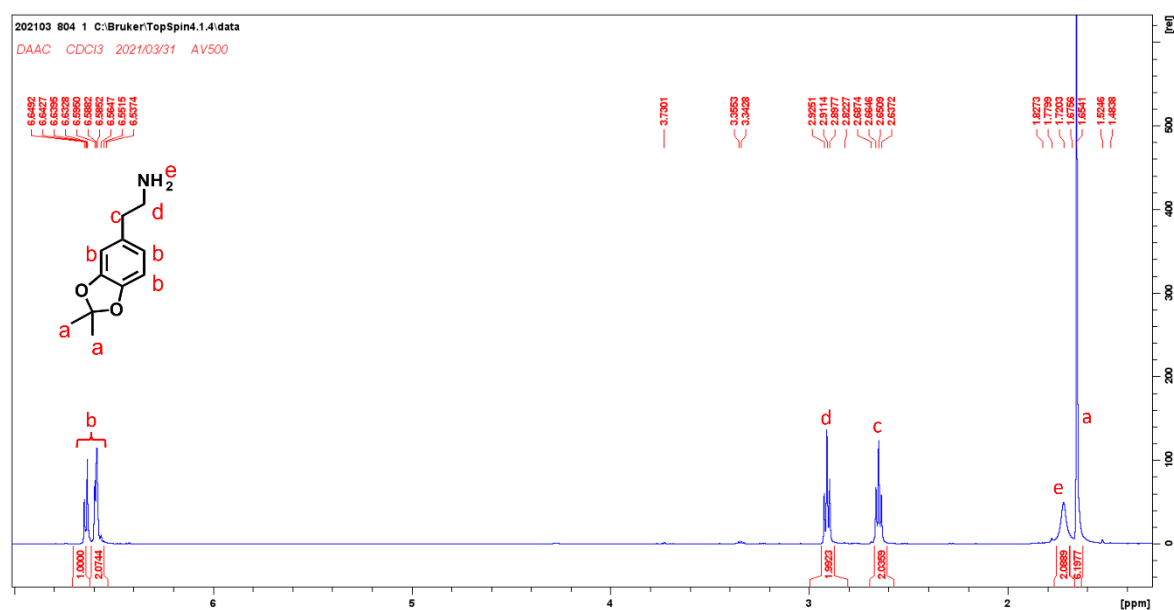

**Figure S3** The  $^1\text{H}$ -NMR spectra of DAAC

#### S4. Synthesis of BrDAAC

The  $^1\text{H}$ -NMR spectra of BrDAAC was shown in Figure S4.  $^1\text{H}$ -NMR (500MHz,  $\text{CDCl}_3$ )  $\delta$  (ppm) : 6.74 – 6.72 (s, 1H), 6.66 – 6.65 (m, 1H), 6.60 – 6.59 (m, 2H), 3.47 – 3.44 (q, 2H), 2.75 – 2.72 (t, 2H), 1.93 – 1.92 (s, 6H), 1.66 – 1.59 (s, 6H).

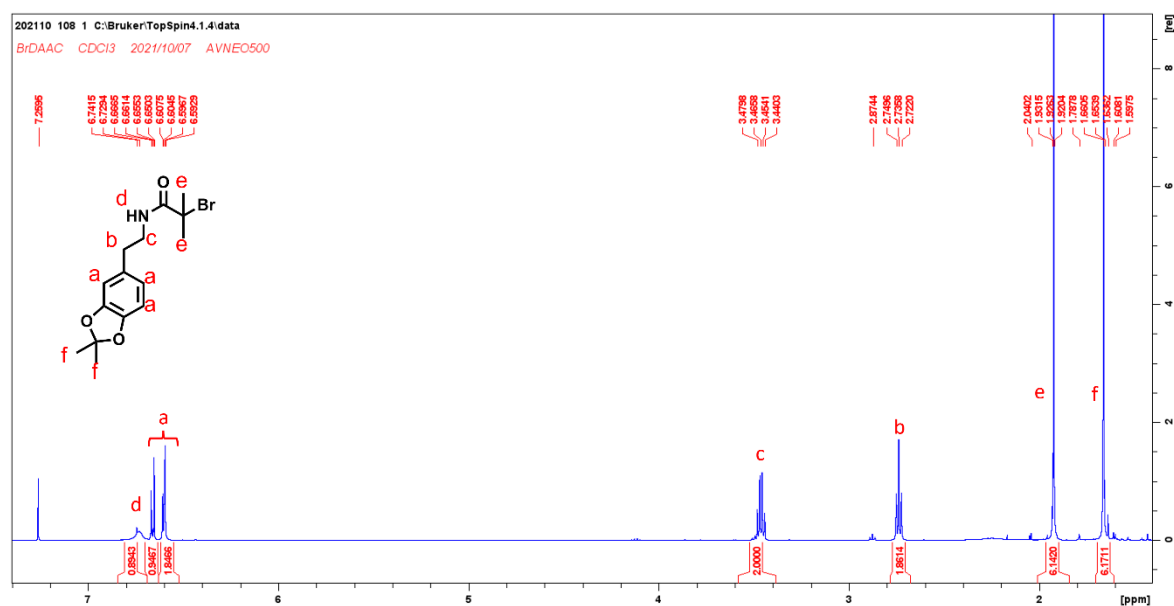

Figure S4 The  $^1\text{H}$ -NMR spectra of BrDAAC

#### S5. Synthesis of BrDA

The  $^1\text{H}$ -NMR spectra of BrDA was shown in Figure S5.  $^1\text{H}$ -NMR (500MHz,  $\text{CDCl}_3$ )  $\delta$  (ppm) : 6.94 (s, 1H), 6.85 – 6.58 (m, 3H), 5.66 (s, 2H), 3.50 – 3.46 (q, 2H), 2.73 – 2.70 (t, 2H), 1.91 – 1.88 (s, 6H).

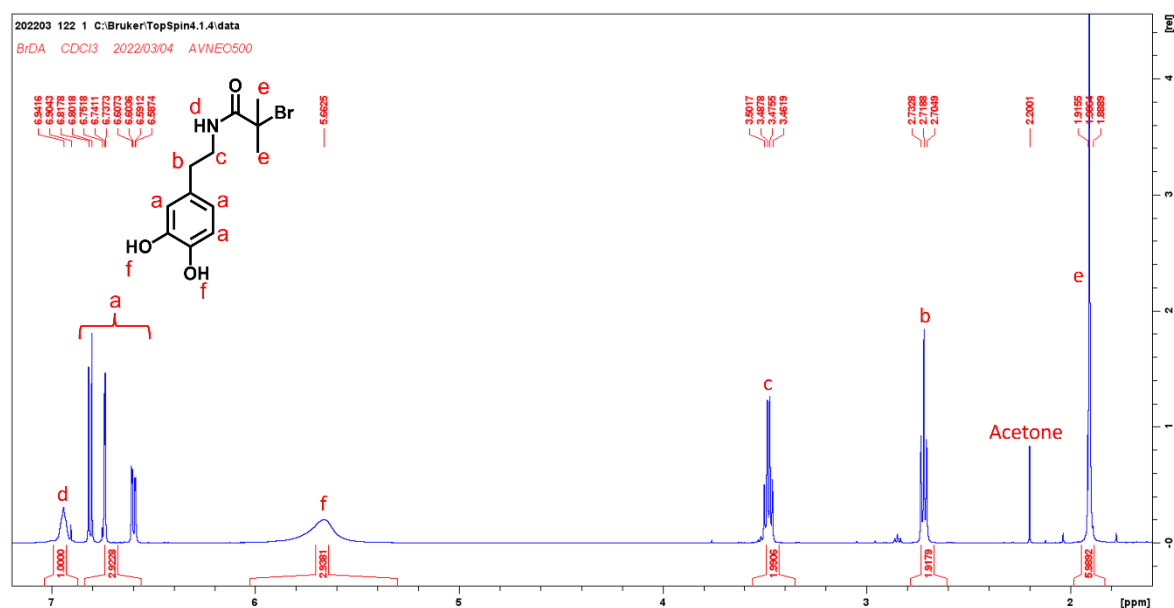

**Figure S5** The  $^1\text{H}$ -NMR spectra of BrDA

## S6. Synthesis of DMAEMA-C8

The  $^1\text{H}$ -NMR spectra of DMAEMA-C8 was shown in Figure S6.  $^1\text{H}$ -NMR (500MHz,  $\text{D}_2\text{O}$ )  $\delta$  (ppm) : 6.12 (s, 1H), 5.75 – 5.74 (s, 1H), 4.58 (s, 2H), 3.73 – 3.71 (quintet, 2H), 3.36 – 3.33 (quintet, 2H), 3.12 – 3.08 (s, 6H), 1.90 (s, 3H), 1.76 – 1.73 (t, 2H), 1.30 – 1.23 (m, 10H), 0.83 – 0.80 (t, 3H).

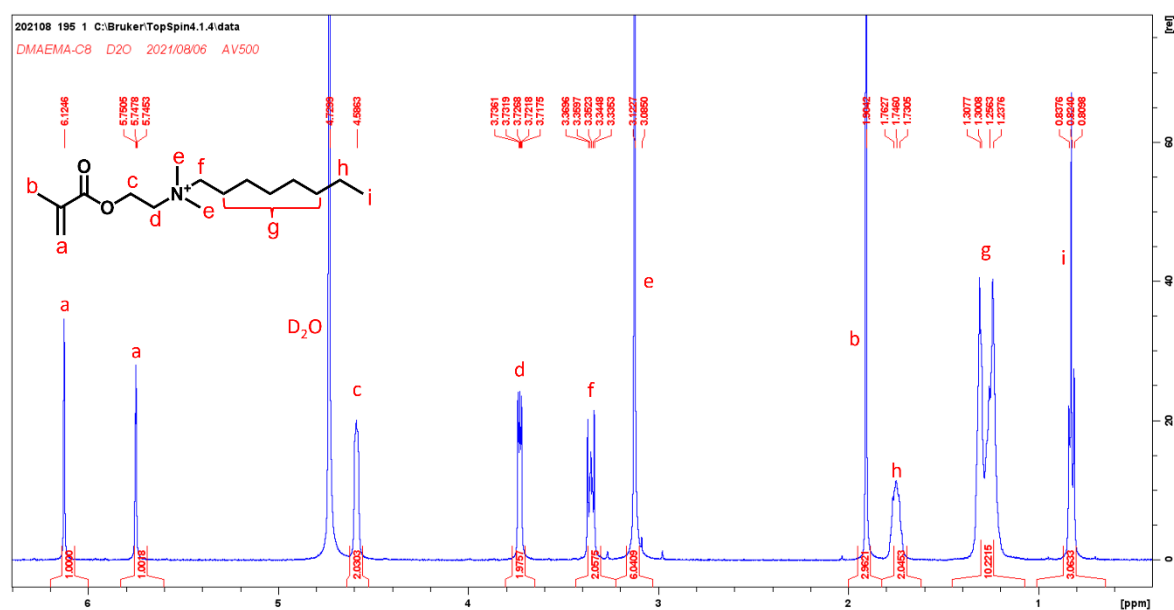

**Figure S6** The  $^1\text{H}$ -NMR spectra of DMAEMA-C8

### S7. Synthesis of final product PQA-C8

The  $^1\text{H}$ -NMR spectra of PQA-C8 was shown in Figure S7. It indicated that the PQA-C8 was prepared successfully.  $^1\text{H}$ -NMR (500MHz,  $\text{CD}_3\text{OD}$ )  $\delta$  (ppm) : 6.65 – 6.68 (m, 3H), 4.60 (s, 2H), 3.97 (s, 2H), 3.61 (s, 2H), 3.34 (s, 6H), 0.94 – 0.91 (t, 3H).

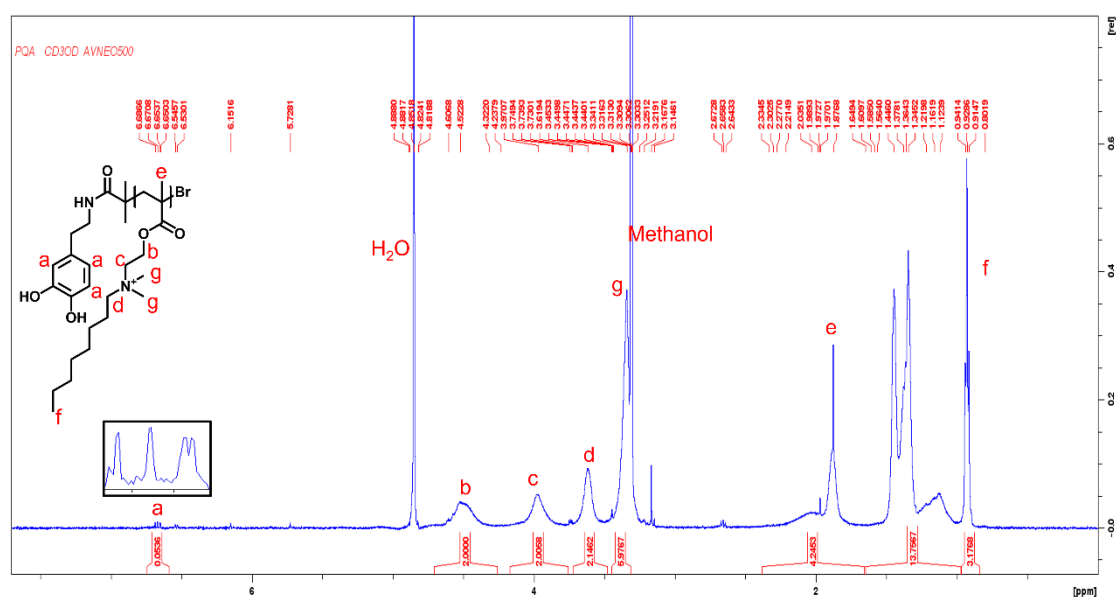

**Figure S7** The  $^1\text{H}$ -NMR spectra of PQA-C8

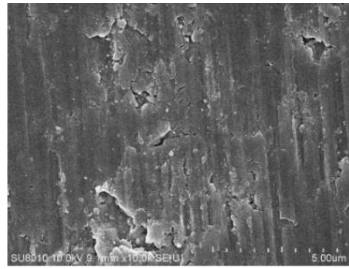

**bare Ti**

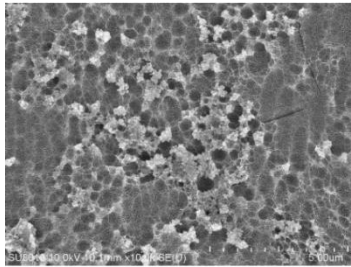

**10:0-Ti**

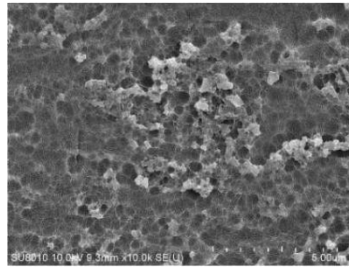

**10:0.5-Ti**

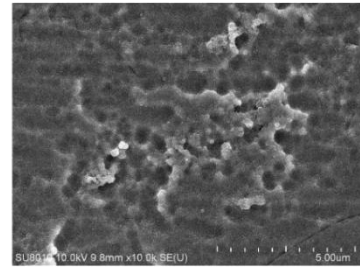

**10:1-Ti**

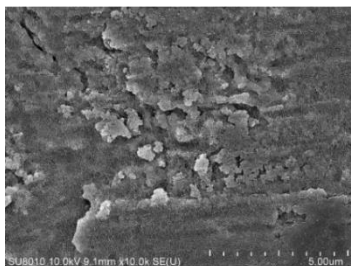

**10:0-Ti (CuSO<sub>4</sub>/H<sub>2</sub>O<sub>2</sub>)**

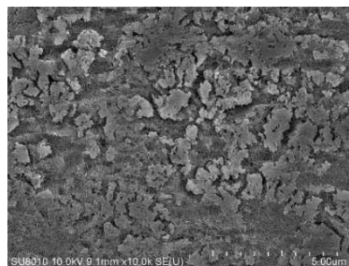

**10:0.5-Ti (CuSO<sub>4</sub>/H<sub>2</sub>O<sub>2</sub>)**

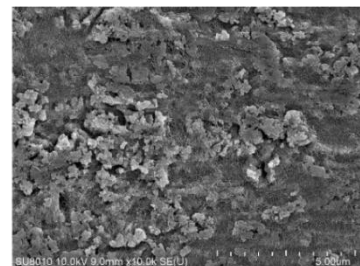

**10:1-Ti (CuSO<sub>4</sub>/H<sub>2</sub>O<sub>2</sub>)**

**Figure S8** The SEM micrographs of the bare Ti substrate and different modified Ti ones

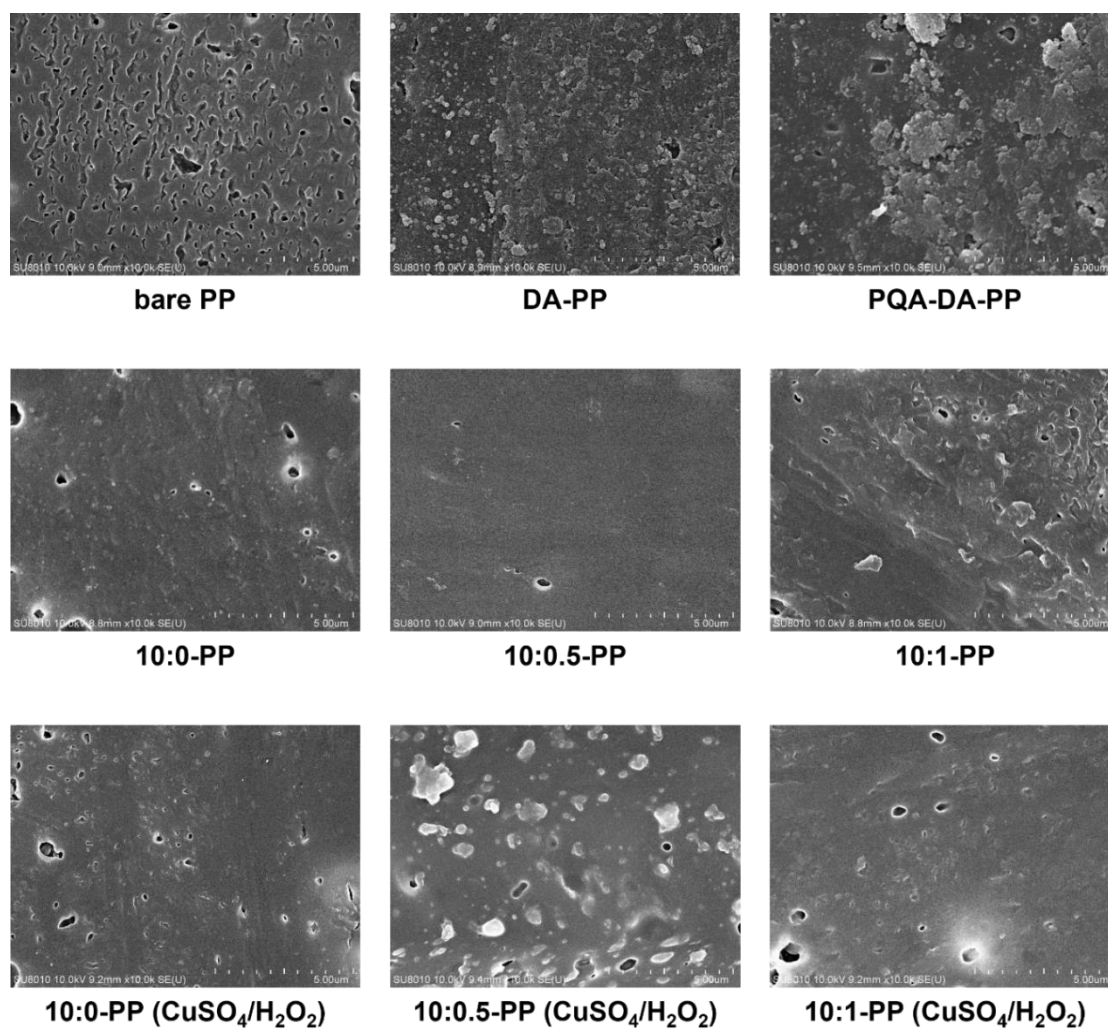

**Figure S9** The SEM micrographs of the bare PP substrate and different modified PP ones



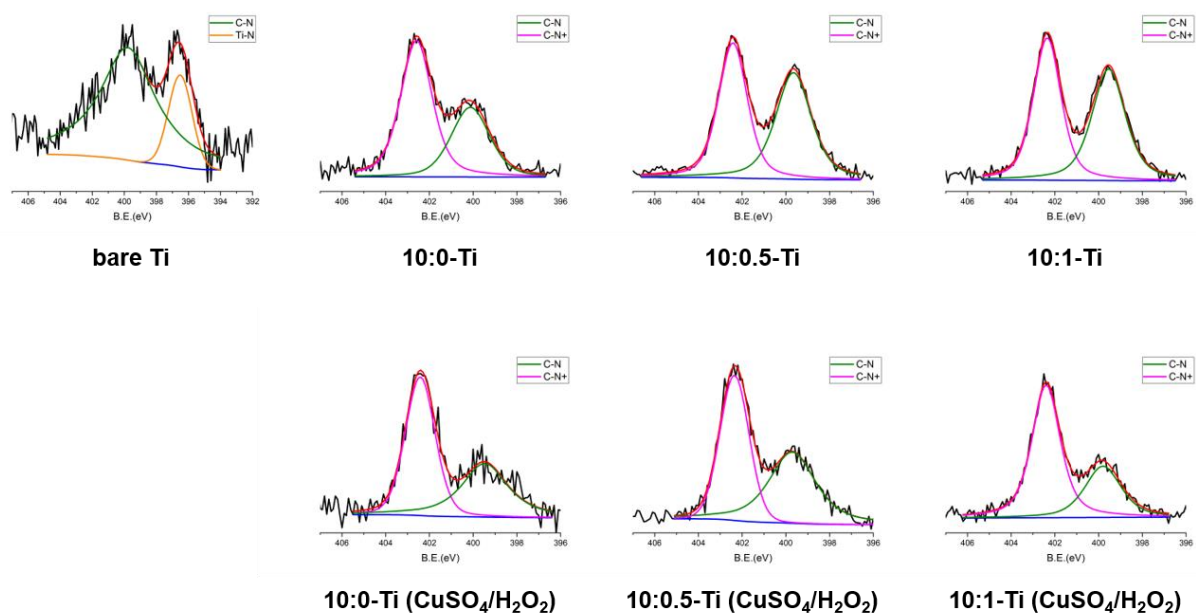

**Figure S10** The N1s curve fitting results for the bare Ti substrate and different modified

ones

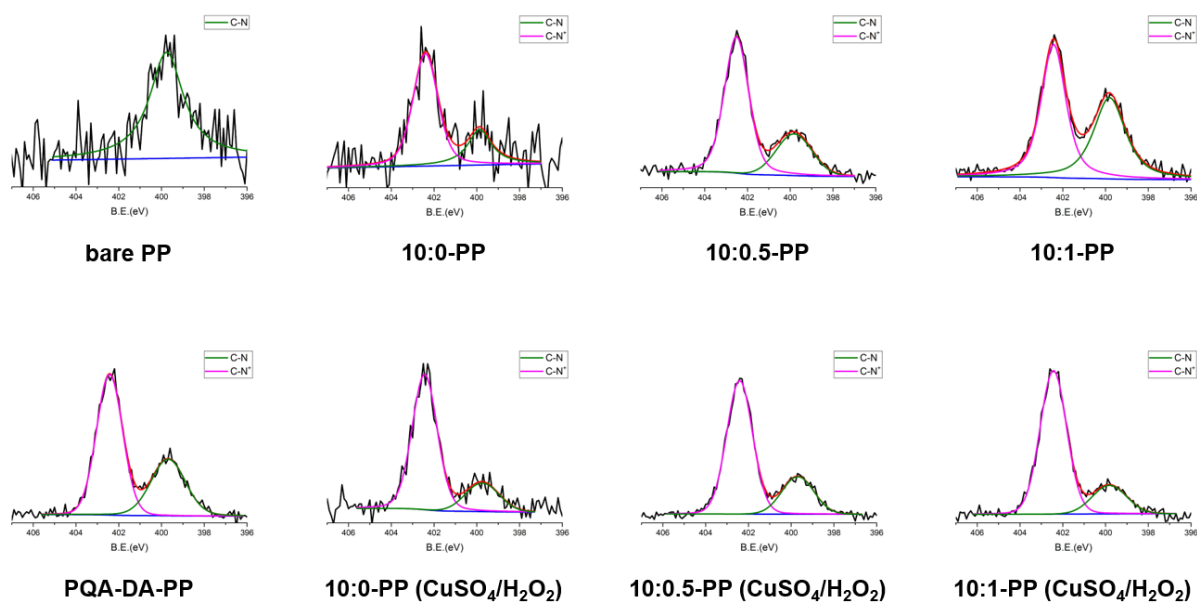

**Figure S11** The N1s curve fitting results for the bare PP substrate and different modified

ones.

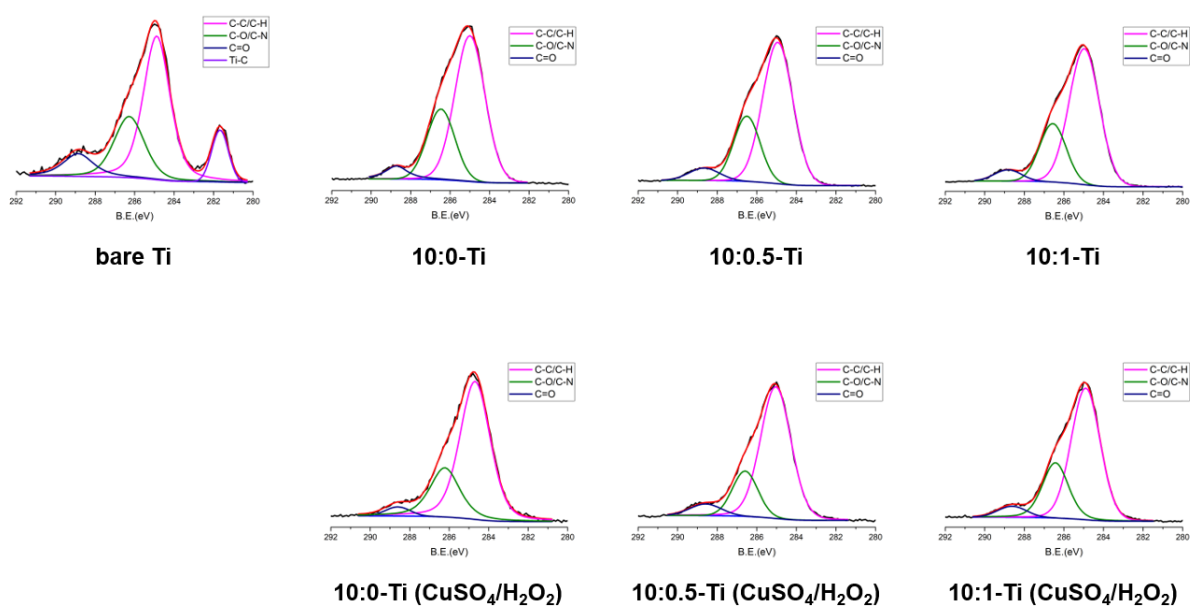

**Figure S12** The C1s curve fitting results for the bare Ti substrate and different modified ones.

**Table S1** The C1s curve-fitting results of titanium substrate modified by different methods

| Sample                                                        | <u>C</u> - <u>C</u> / <u>C</u> - <u>H</u><br>(285 eV) | <u>C</u> - <u>O</u> / <u>C</u> - <u>N</u><br>(286.6 eV) | <u>C</u> = <u>O</u><br>(288.6 eV) | Ti- <u>C</u><br>(282 eV) |
|---------------------------------------------------------------|-------------------------------------------------------|---------------------------------------------------------|-----------------------------------|--------------------------|
| bare Ti                                                       | 53.9%                                                 | 25.2%                                                   | 10.6%                             | 10.3%                    |
| 10:0-Ti                                                       | 62.6%                                                 | 31.8%                                                   | 5.7%                              | 0%                       |
| 10:0.5-Ti                                                     | 67.3%                                                 | 26.8%                                                   | 5.9%                              | 0%                       |
| 10:1-Ti                                                       | 69.3%                                                 | 25.7%                                                   | 5.0%                              | 0%                       |
| 10:0-Ti (CuSO <sub>4</sub> /H <sub>2</sub> O <sub>2</sub> )   | 70.1%                                                 | 26.6%                                                   | 3.3%                              | 0%                       |
| 10:0.5-Ti (CuSO <sub>4</sub> /H <sub>2</sub> O <sub>2</sub> ) | 73.3%                                                 | 20.5%                                                   | 6.3%                              | 0%                       |
| 10:1-Ti (CuSO <sub>4</sub> /H <sub>2</sub> O <sub>2</sub> )   | 67.5%                                                 | 27.1%                                                   | 5.4%                              | 0%                       |

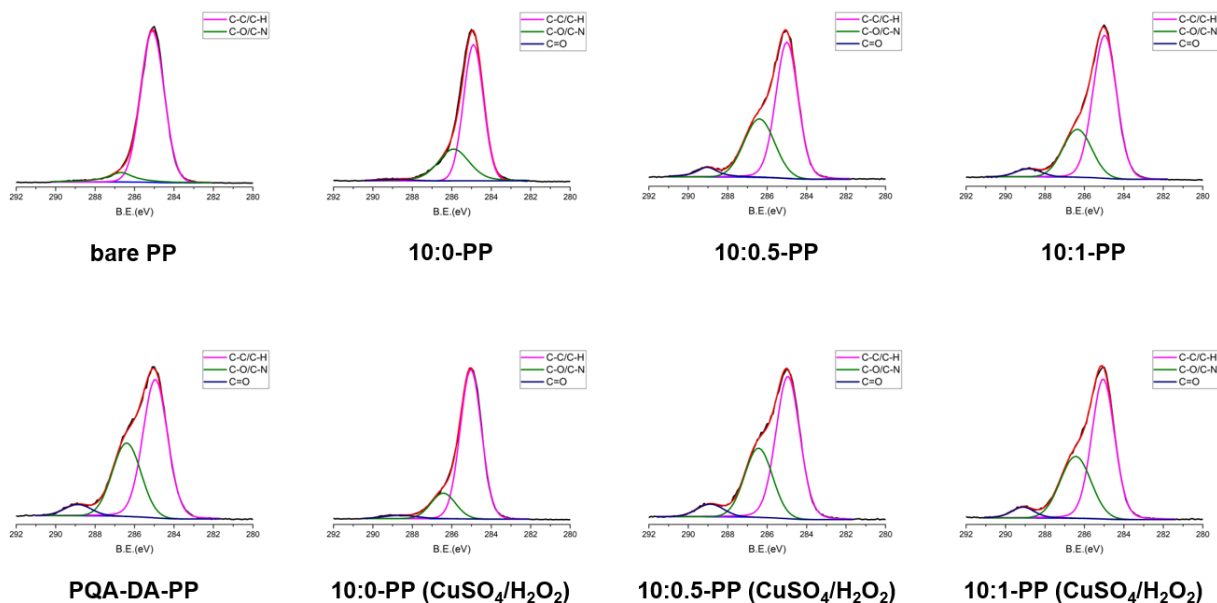

**Figure S13** The C1s curve fitting results for the bare PP substrate and different modified ones.

**Table S2** The C1s curve-fitting results of polypropylene substrate modified by different methods

| Sample                                                        | <u>C</u> -C/ <u>C</u> -H<br>(285 eV) | <u>C</u> -O/ <u>C</u> -N<br>(286.6 eV) | <u>C</u> =O<br>(288.6 eV) |
|---------------------------------------------------------------|--------------------------------------|----------------------------------------|---------------------------|
| bare PP                                                       | 91.2 %                               | 8.8 %                                  | 0.0%                      |
| 10:0-PP                                                       | 70.2 %                               | 28.6 %                                 | 1.2%                      |
| 10:0.5-PP                                                     | 60.8 %                               | 34.0 %                                 | 5.2%                      |
| 10:1-PP                                                       | 68.7 %                               | 27.3 %                                 | 4.0%                      |
| 10:0-PP (CuSO <sub>4</sub> /H <sub>2</sub> O <sub>2</sub> )   | 81.1 %                               | 16.1 %                                 | 2.8%                      |
| 10:0.5-PP (CuSO <sub>4</sub> /H <sub>2</sub> O <sub>2</sub> ) | 61.4 %                               | 32.9 %                                 | 5.7%                      |
| 10:1-PP (CuSO <sub>4</sub> /H <sub>2</sub> O <sub>2</sub> )   | 60.8 %                               | 34.1 %                                 | 5.1%                      |
| PQA-DA-PP                                                     | 59.85 %                              | 35.13 %                                | 5.02%                     |

**Table S3** Released copper ion concentration

| Sample                                                        | Cu <sup>2+</sup> concentration (ppm) | RSD% |
|---------------------------------------------------------------|--------------------------------------|------|
| 10:0-Ti (CuSO <sub>4</sub> /H <sub>2</sub> O <sub>2</sub> )   | 0.055                                | 1.93 |
| 10:0.5-Ti (CuSO <sub>4</sub> /H <sub>2</sub> O <sub>2</sub> ) | 0.039                                | 1.13 |
| 10:1-Ti (CuSO <sub>4</sub> /H <sub>2</sub> O <sub>2</sub> )   | 0.037                                | 2.73 |
| 10:0-PP (CuSO <sub>4</sub> /H <sub>2</sub> O <sub>2</sub> )   | 0.029                                | 4.71 |
| 10:0.5-PP (CuSO <sub>4</sub> /H <sub>2</sub> O <sub>2</sub> ) | 0.029                                | 1.13 |
